# Supplementary material
Source: publisher figshare collection journal article supplement (https://karger.figshare.com/articles/dataset/_/8230547)
Supplement: Supplementary file 1 [file 1]

**Table S1.** Percent of infants which were breast-fed by the mother within the 5 days preceding the study visit

| <b>Age</b>     | <b>n</b> | <b>Breast-fed</b> | <b>Not breast-fed</b> |
|----------------|----------|-------------------|-----------------------|
| 1 wk           |          |                   |                       |
| well-nourished | 21       | 86%               | 14%                   |
| malnourished   | 22       | 91%               | 9%                    |
| 4 wk           |          |                   |                       |
| well-nourished | 23       | 96%               | 4%                    |
| malnourished   | 22       | 82%               | 18%                   |
| 6 mo           |          |                   |                       |
| well-nourished | 24       | 67%               | 33%                   |
| malnourished   | 22       | 50%               | 50%                   |
| 9 mo           |          |                   |                       |
| well-nourished | 22       | 59%               | 41%                   |
| malnourished   | 22       | 32%               | 68%                   |
| 12 mo          |          |                   |                       |
| well-nourished | 22       | 41%               | 59%                   |
| malnourished   | 22       | 32%               | 68%                   |
| 24 mo          |          |                   |                       |
| well-nourished | 22       | 0%                | 100%                  |
| malnourished   | 22       | 14%               | 86%                   |
| 36 mo          |          |                   |                       |
| well-nourished | 22       | 0%                | 100%                  |
| malnourished   | 22       | 5%                | 95%                   |
