# Supplementary material
Source: publisher figshare collection journal article supplement (https://karger.figshare.com/articles/dataset/_/8230547)
Supplement: Supplementary file 2 [file 1]

Figure S5

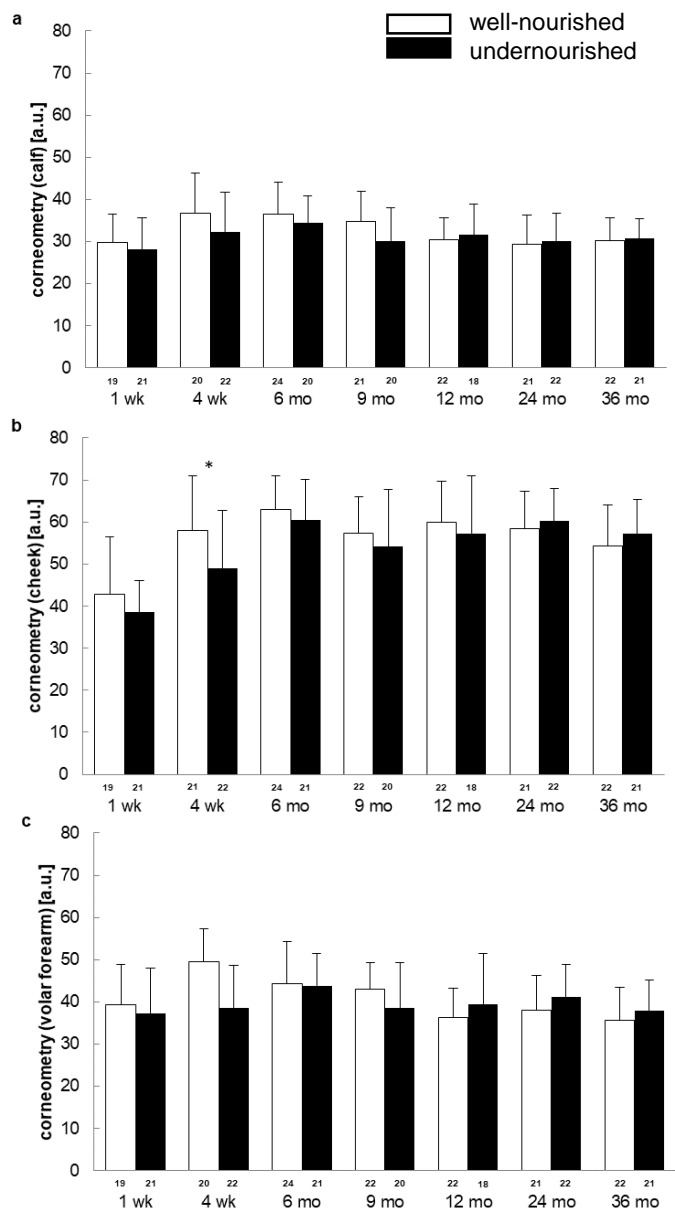

**Fig. S5.** Comparison of skin hydration measured by corneometry in well-nourished and undernourished infants in seven age groups. Units are arbitrary units (a.u.). The values are shown as mean  $\pm$  SD. N for each group is shown beneath the respective bar.

\* $p < 0.05$
